# Supplementary material for: Plant lighting system with five wavelength-band light-emitting diodes providing photon flux density and mixing ratio control
Source: PubMed Central journal article supplement (PMC3573946; doi:10.1186/1746-4811-8-46), 2012-11-22

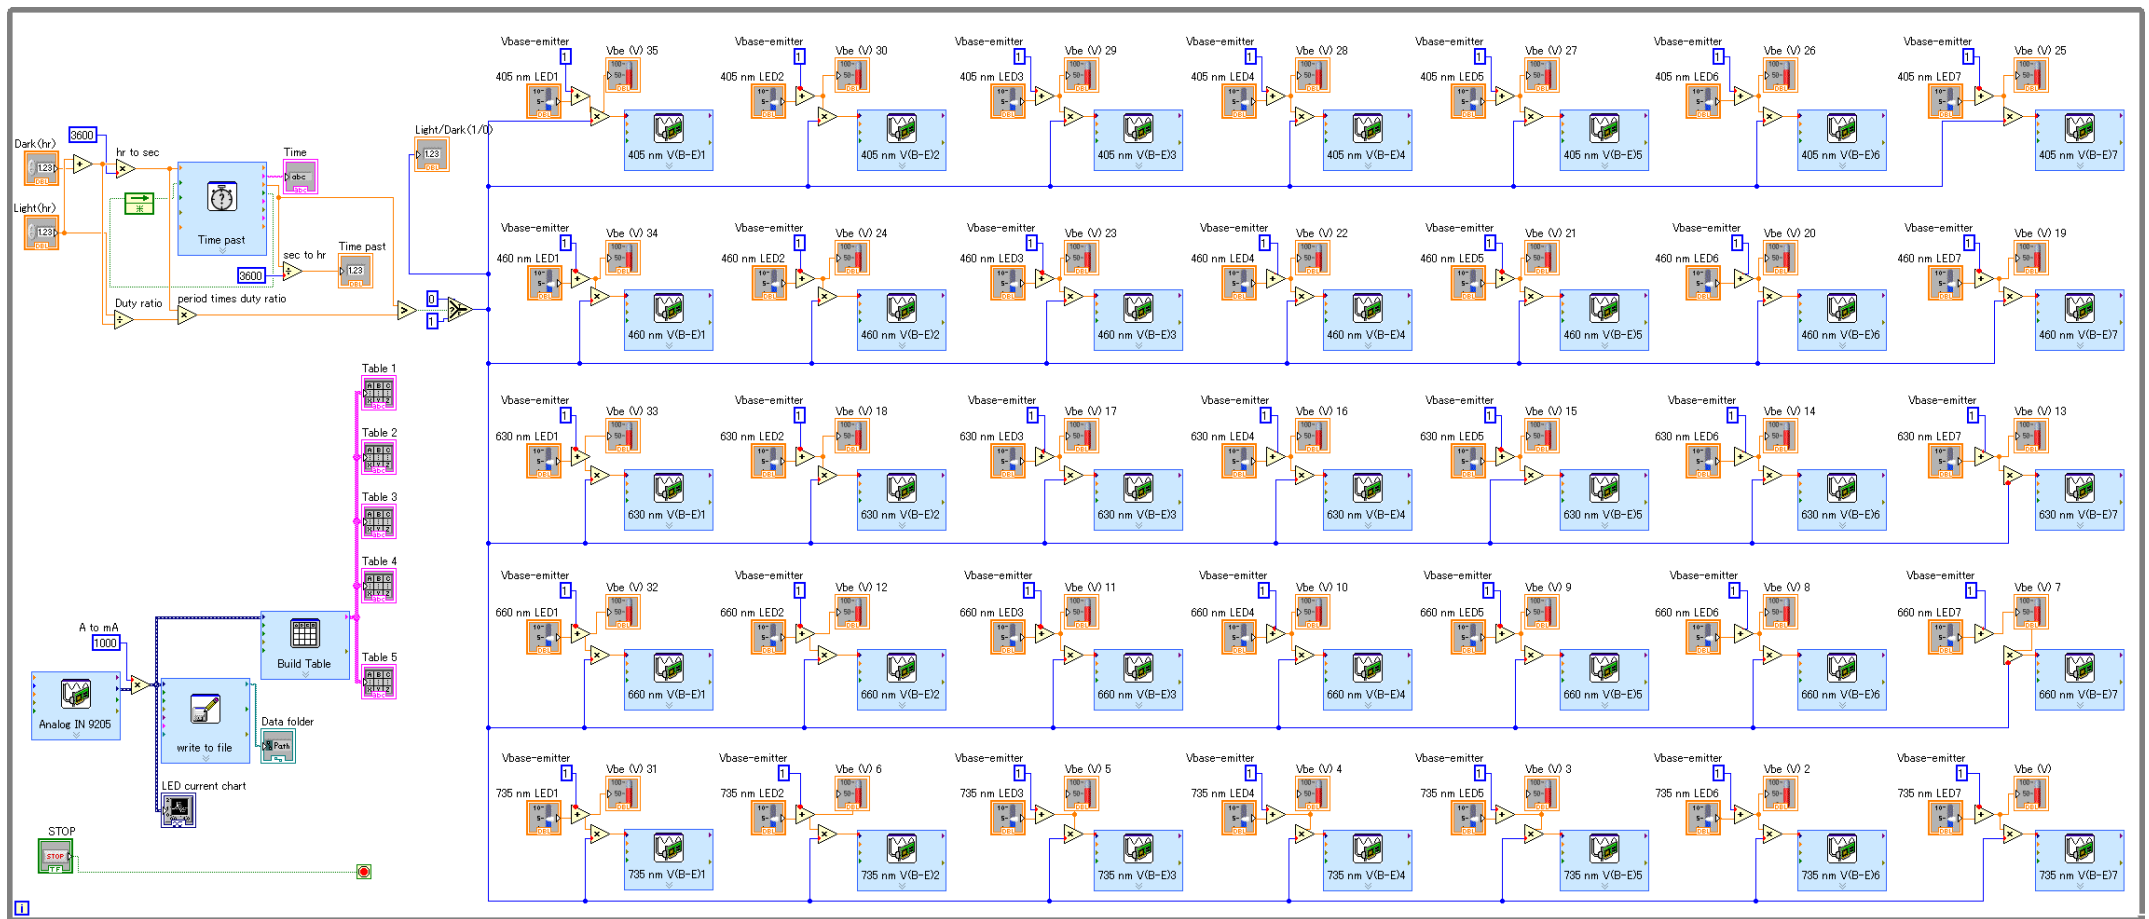

Supplement: 1746-4811-8-46-S1.pdf [file 1746-4811-8-46-S1.pdf]
